# Supplementary material for: The role of insulators and transcription in 3D chromatin organization of flies
Source: PubMed Central journal article supplement (PMC8997359; doi:10.1101/gr.275809.121), 2022-04
Supplement: supp_gr.275809.121_Supplemental_Fig_S1.pdf [file supp_gr.275809.121_Supplemental_Fig_S1.pdf]

**A**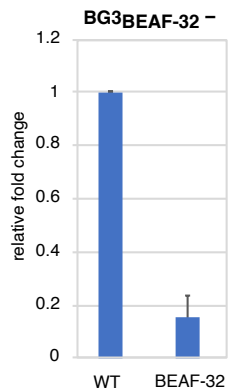**B**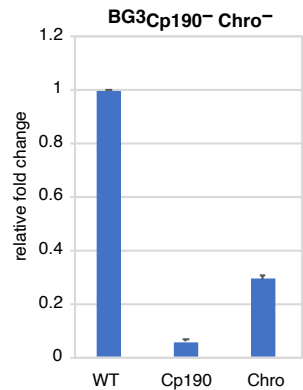**C**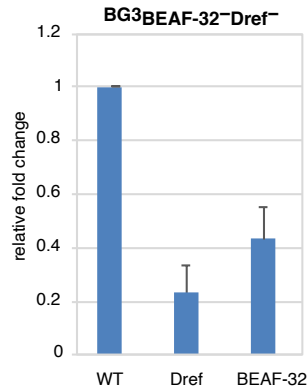**D**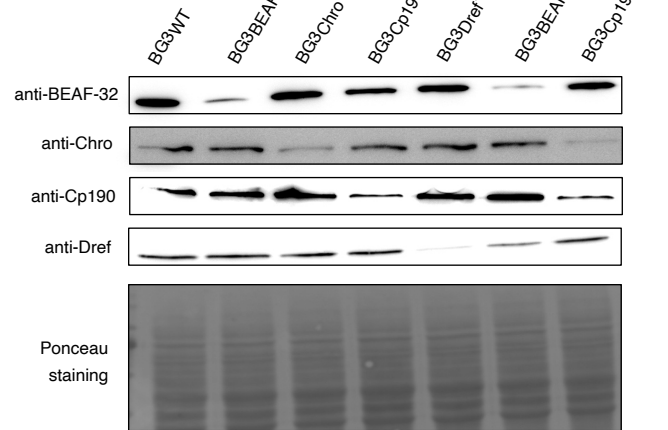**E**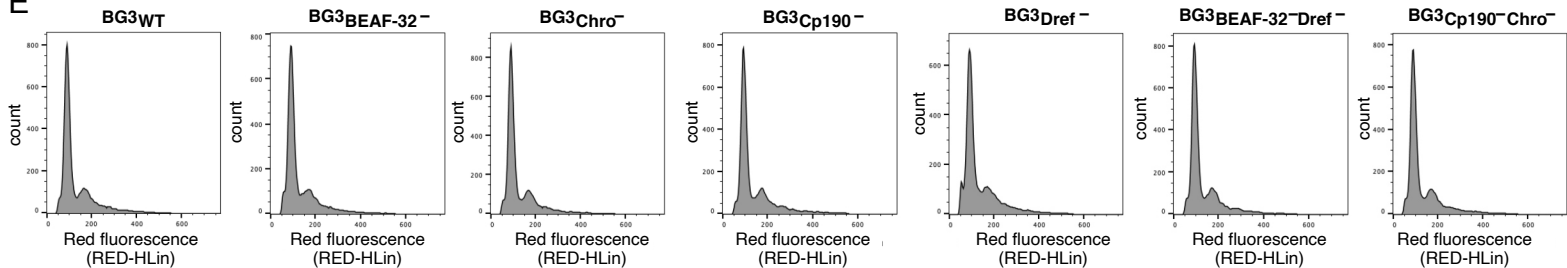

**Figure S1.** *RNAi efficiency and cell cycle analysis in the three knockdowns.* RT-qPCR in (A) BEAF-32 single knockdown, (B) Cp190 Chro double knockdown and (C). BEAF-32 Dref double knockdown. Data is normalised with Rpl32 and plotted relative to WT levels. (D) Western Blots showing the depletion of BEAF-32, Chro, Cp190 and Dref following RNAi treatment in WT and BEAF-32, Cp190, Chro and Dref single and double knockdowns as indicated in the panel. (E) FACS analysis showing no effect on cell growth or cell cycle arrest in WT or BEAF-32, Cp190, Chro and Dref single and double knockdowns.
