# Supplementary material for: The role of insulators and transcription in 3D chromatin organization of flies
Source: PubMed Central journal article supplement (PMC8997359; doi:10.1101/gr.275809.121), 2022-04
Supplement: supp_gr.275809.121_Supplemental_Fig_S3.pdf [file supp_gr.275809.121_Supplemental_Fig_S3.pdf]

A

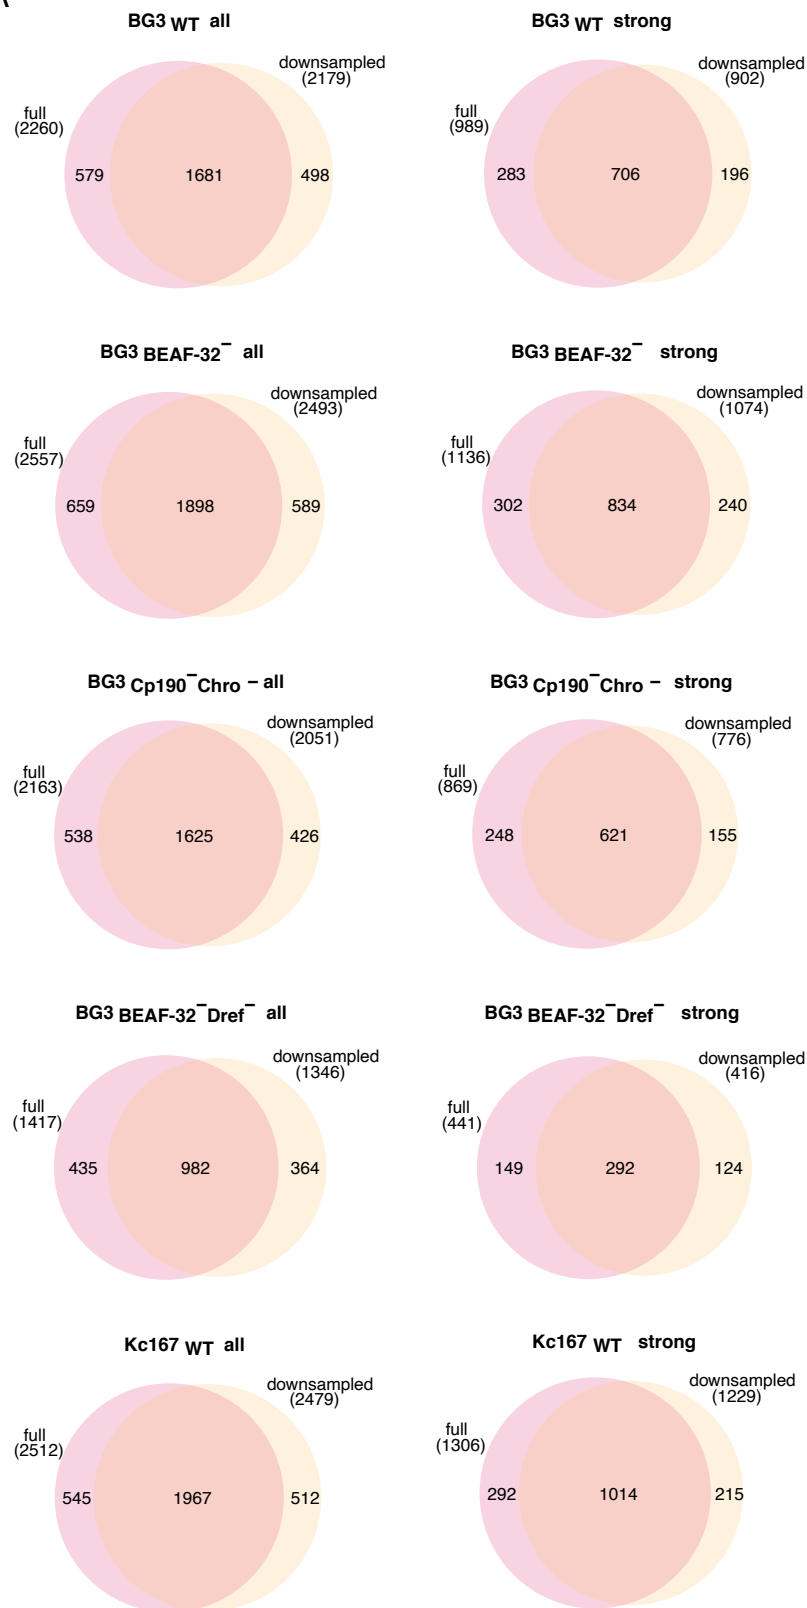

B

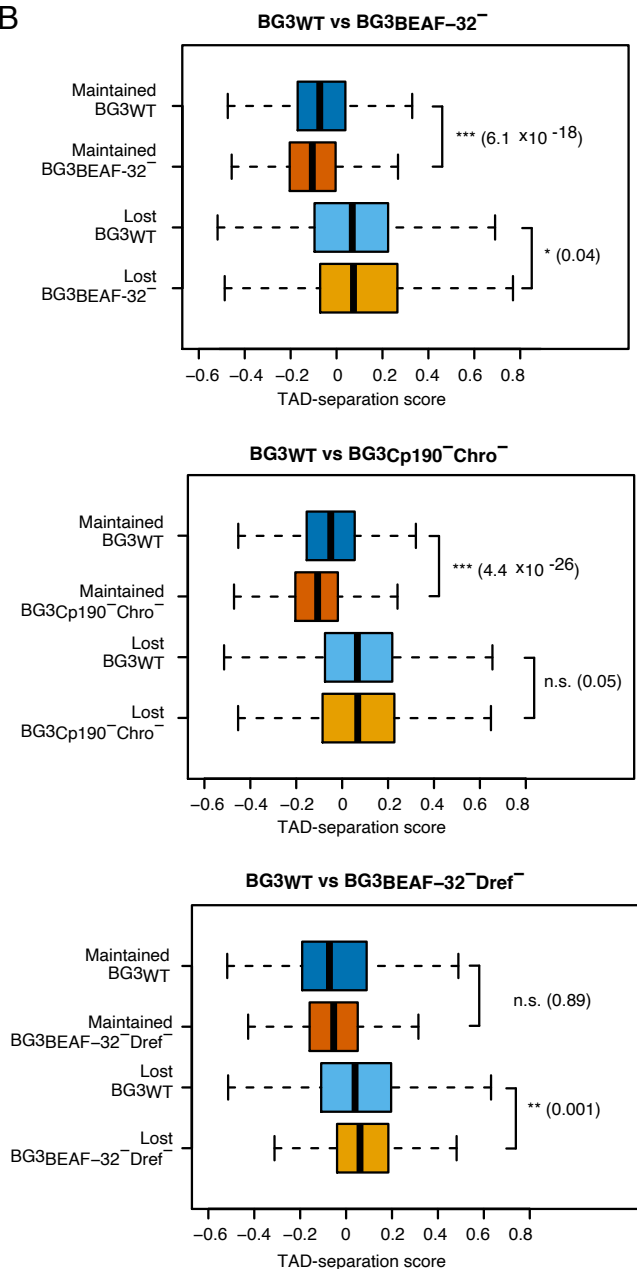

C

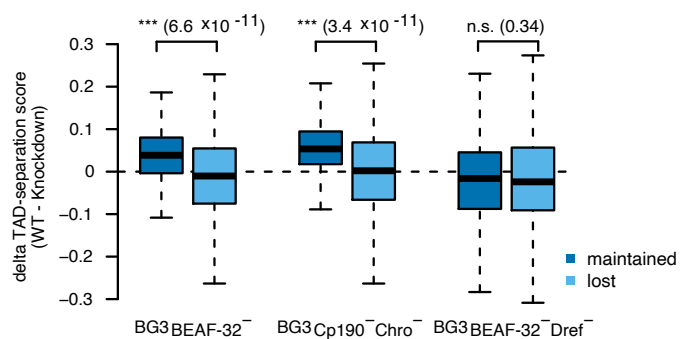

**Figure S3. Robustness of TAD borders.** (A) We considered both the full dataset and a downsampled dataset where we randomly removed 20% of the reads. We consider the case of all (left) and strong (right) borders separately for Hi-C datasets in BG3 WT and the three knockdowns: BEAF-32 single knockdown, Chro and Cp190 double knockdown and BEAF-32 and Dref double knockdown. We also consider the case of Kc167 WT cells. (B) Comparison of the insulation score at maintained and lost TAD borders between WT and the three knockdowns. Higher values represent less insulation in the TAD. We performed the one-sided paired Mann-Whitney  $U$  test. (C) Delta score (difference between WT and knockdown) at maintained and lost TAD borders in the three knockdowns. We performed the one-sided Mann-Whitney  $U$  test. We denoted p-values as: n.s.  $\geq 0.05$ , \* p-value  $< 0.05$ , \*\*  $< 0.01$  and \*\*\*  $< 0.001$ .
