# Supplementary material for: The role of insulators and transcription in 3D chromatin organization of flies
Source: PubMed Central journal article supplement (PMC8997359; doi:10.1101/gr.275809.121), 2022-04
Supplement: supp_gr.275809.121_Supplemental_Fig_S5.pdf [file supp_gr.275809.121_Supplemental_Fig_S5.pdf]

A

## strong new borders

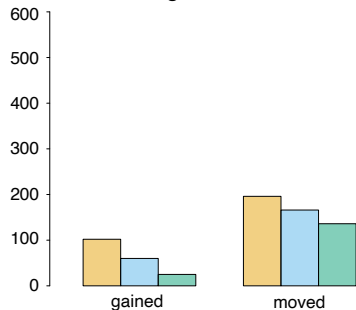

|                  | gained | moved |
|------------------|--------|-------|
| BG3BEAF-32-      | 102    | 196   |
| BG3Cp190-Chro-   | 60     | 166   |
| BG3BEAF-32-Dref- | 25     | 136   |

B

## weak new borders

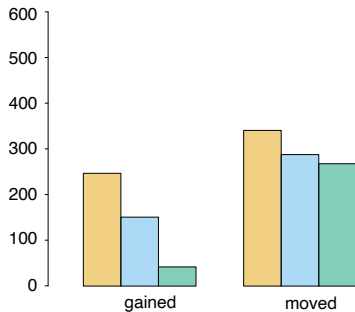

|                  | gained | moved |
|------------------|--------|-------|
| BG3BEAF-32-      | 247    | 341   |
| BG3Cp190-Chro-   | 151    | 288   |
| BG3BEAF-32-Dref- | 42     | 268   |

C

## all new borders

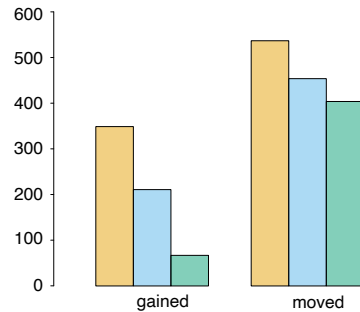

|                  | gained | moved |
|------------------|--------|-------|
| BG3BEAF-32-      | 349    | 537   |
| BG3Cp190-Chro-   | 211    | 454   |
| BG3BEAF-32-Dref- | 67     | 404   |

**Figure S5.** *Classification of new TAD borders in the knockdowns.* New borders in the three knockdowns (BEAF-32 knockdown, Cp190 Chro double knockdown and BEAF-32 Dref double knockdown) can be gained as a consequence appearing inside a WT TAD (splitting a TAD) or moved when they correspond to relocation of a WT TAD border. We considered the cases of: (A) new strong borders; (B) new weak borders; (C) all new borders.
