# Supplementary material for: The role of insulators and transcription in 3D chromatin organization of flies
Source: PubMed Central journal article supplement (PMC8997359; doi:10.1101/gr.275809.121), 2022-04
Supplement: supp_gr.275809.121_Supplemental_Fig_S9.pdf [file supp_gr.275809.121_Supplemental_Fig_S9.pdf]

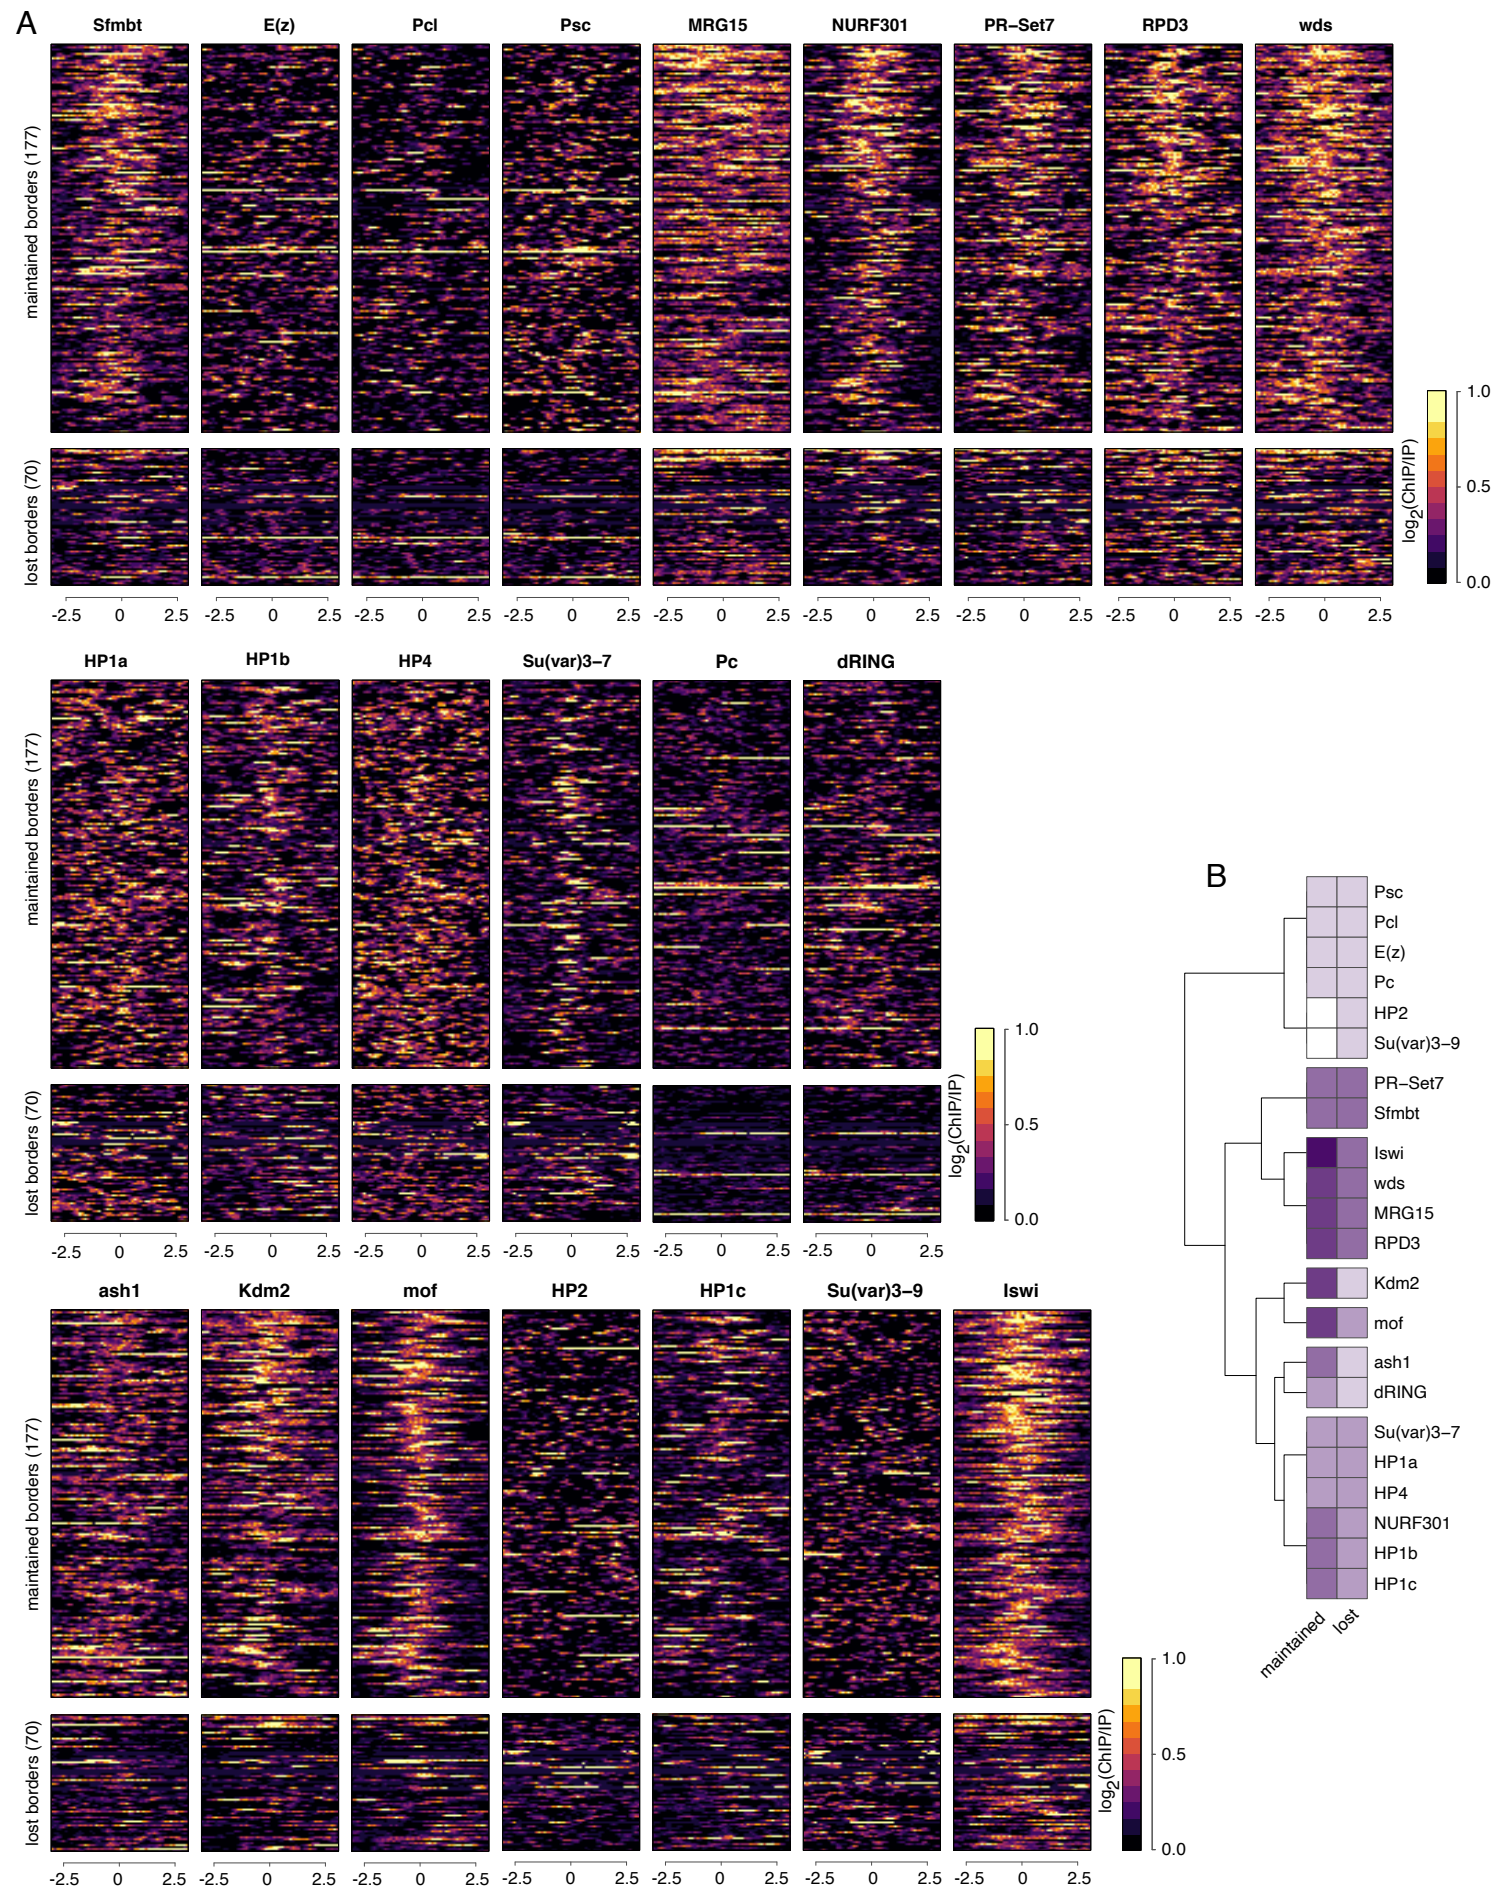

**Figure S9.** *Enrichment of other proteins/complexes at TAD borders.* (A) Profiles of Pc, dRING, ash1, Kdm2, mof, HP2, HP1c, Su(var)3-9, Iswi, Sfmt, E(z), Pcl, Psc, MRG15, NURF301, PR-Set7, RPD3, wds, HP1a, HP1b, HP4 and Su(var)3-7 at direct maintained and lost TAD borders. (B) Clustering of the signal at direct maintained and lost TAD borders.
