# Supplementary material for: The role of insulators and transcription in 3D chromatin organization of flies
Source: PubMed Central journal article supplement (PMC8997359; doi:10.1101/gr.275809.121), 2022-04
Supplement: supp_gr.275809.121_Supplemental_Fig_S12.pdf [file supp_gr.275809.121_Supplemental_Fig_S12.pdf]

A

lost loops (BG3<sup>WT</sup> vs BG3<sup>BEAF-32<sup>-</sup></sup>)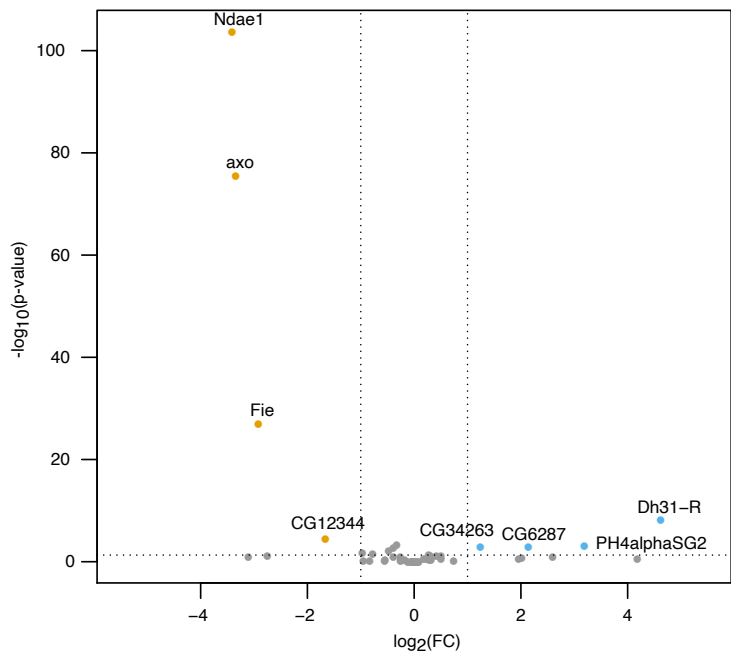

B

maintained loops (BG3<sup>WT</sup> vs BG3<sup>BEAF-32<sup>-</sup></sup>)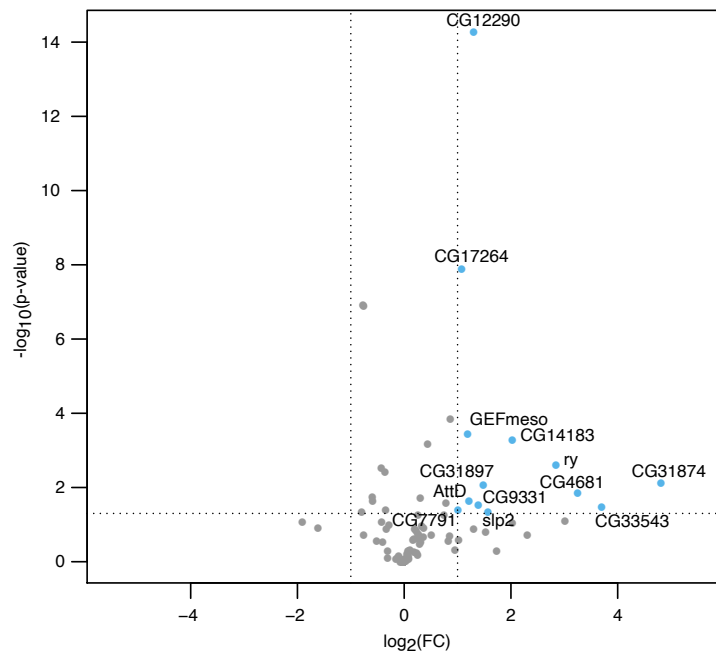

C

lost loops (BG3<sup>WT</sup> vs BG3<sup>Cp190<sup>-</sup> Chro<sup>-</sup></sup>)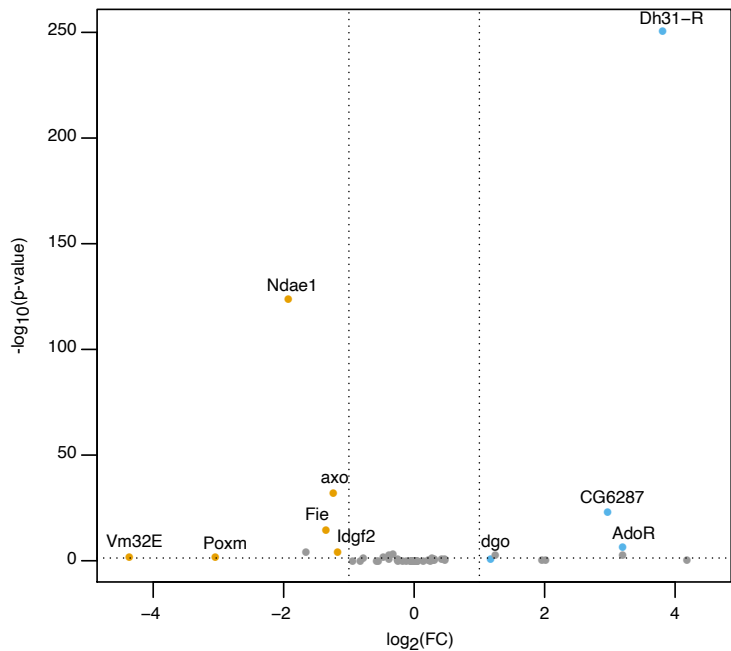

D

maintained loops (BG3<sup>WT</sup> vs BG3<sup>Cp190<sup>-</sup> Chro<sup>-</sup></sup>)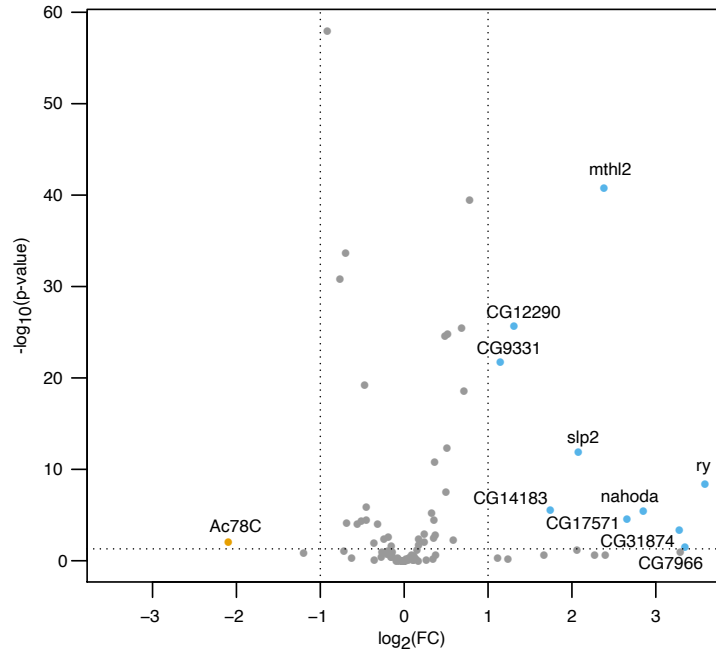

**Figure S12.** *Differential expression of genes located at chromatin loops.* Volcano plots of the  $-\log_{10}$  of the adjusted p-value as a function of  $\log_2$  fold change. We considered all genes located at lost chromatin loops (A and C) and maintained chromatin loops (B and D) in BEAF-32 single knockdown (A and B) and Cp190 and Chro double knockdown (C and D).
