# Supplementary material for: The role of insulators and transcription in 3D chromatin organization of flies
Source: PubMed Central journal article supplement (PMC8997359; doi:10.1101/gr.275809.121), 2022-04
Supplement: supp_gr.275809.121_Supplemental_Fig_S15.pdf [file supp_gr.275809.121_Supplemental_Fig_S15.pdf]

A

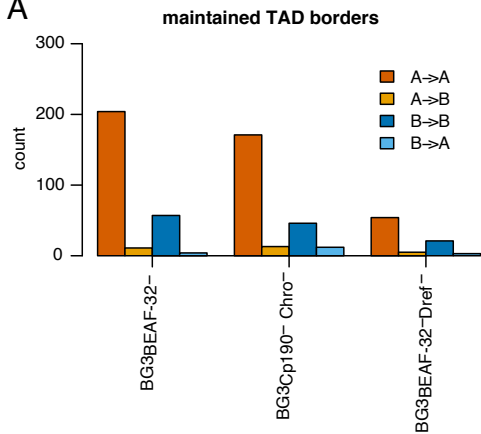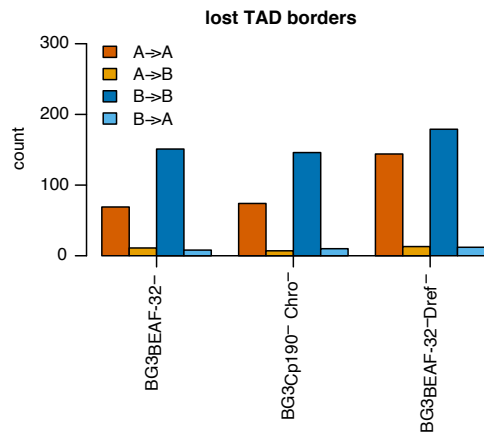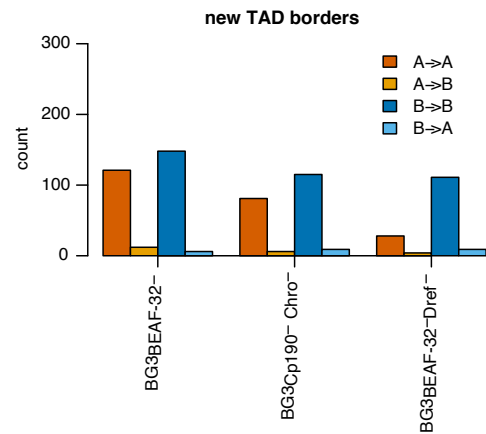

B

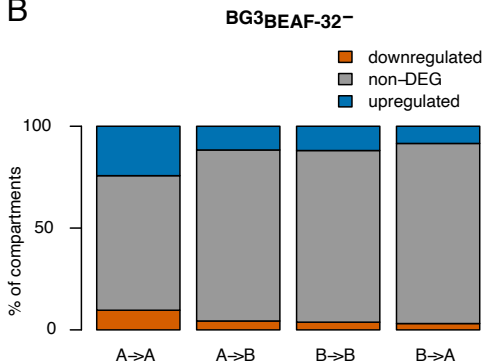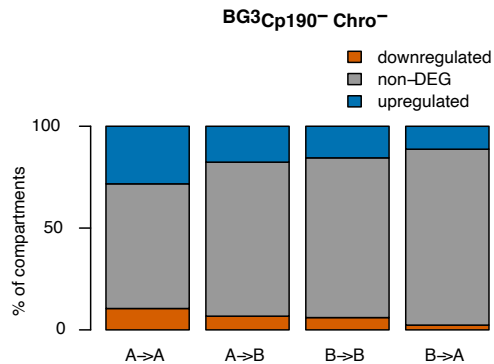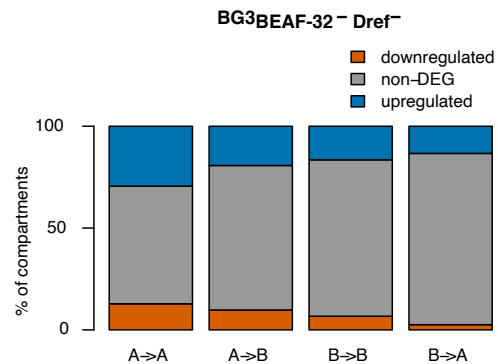

**Figure S15.** *Characterisation of compartments based on TADs and differential gene expression.* (A) Distribution of maintained, lost and new TAD borders in different classes of compartments switching for the three knockdowns. (B) Percentage of compartments switching that overlap with DEG and non-DEGs. We used a  $\log_2$  fold change of 1.0 when computing DEGs. Majority of compartments switch do not have any DEG.
